# Supplementary material
Source: PubMed Central journal article supplement (PMC7829549)
Supplement: deaa321_supplementary_figure1.pdf [file deaa321_supplementary_figure1.pdf]

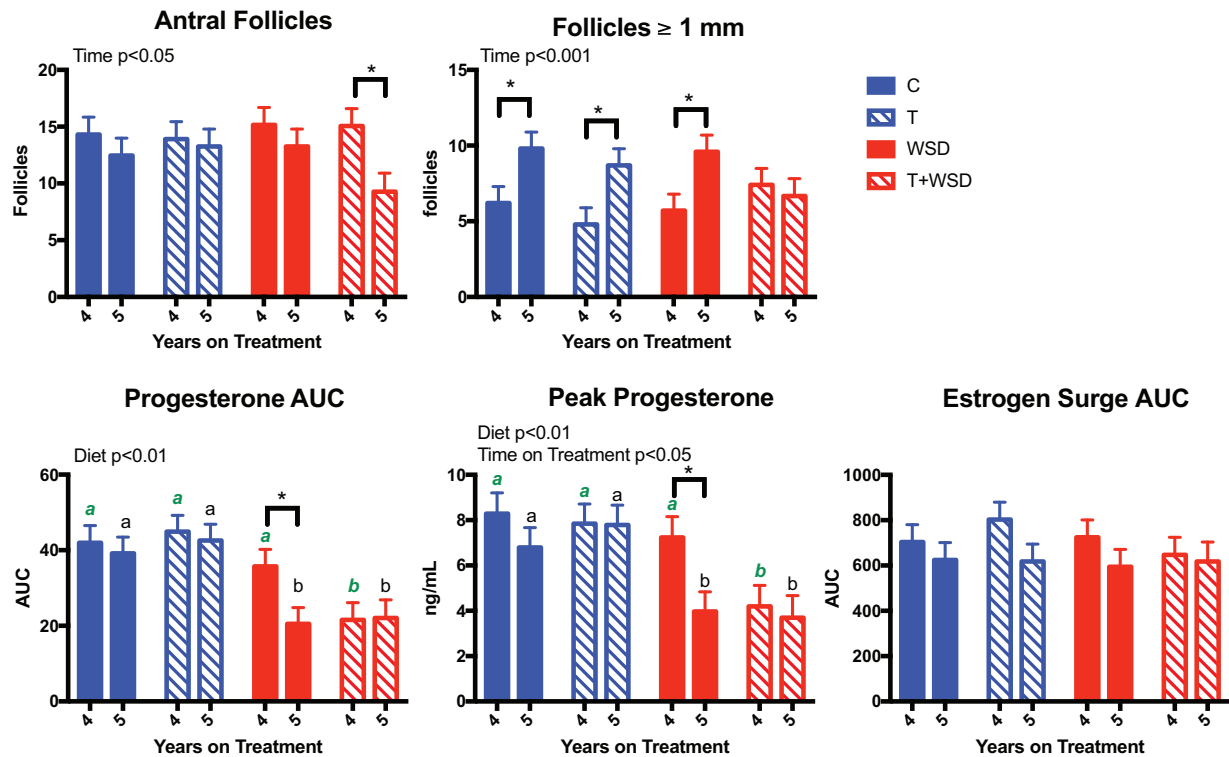

**Supplementary Figure S1. Longitudinal analyses of reproductive parameters before (Year 3.5) and after (Year 4.5) pregnancy, during continuous exposure to T and/or WSD.** Numbers of antral follicles (total and those with diameters  $\geq 1$  mm) were determined by ultrasound analyses in the early follicular phase (near onset of menses). Total measures of progesterone production were determined in the luteal phase, while estrogen surge was analyzed at the end of the follicular phase. All data are presented as means  $\pm$  SEM for each treatment group within the year of treatment. Significant effects of WSD and/or T or interactions between these treatments and year determined by mixed models repeated measures ANOVA are presented as text within the graphs. Different letters signify significant group differences, as determined by Tukey–Kramer *post hoc* analysis. T, testosterone; WSD, Western-style diet.
