# Supplementary material
Source: PubMed Central journal article supplement (PMC7829549)
Supplement: deaa321_supplementary_figure2.pdf [file deaa321_supplementary_figure2.pdf]

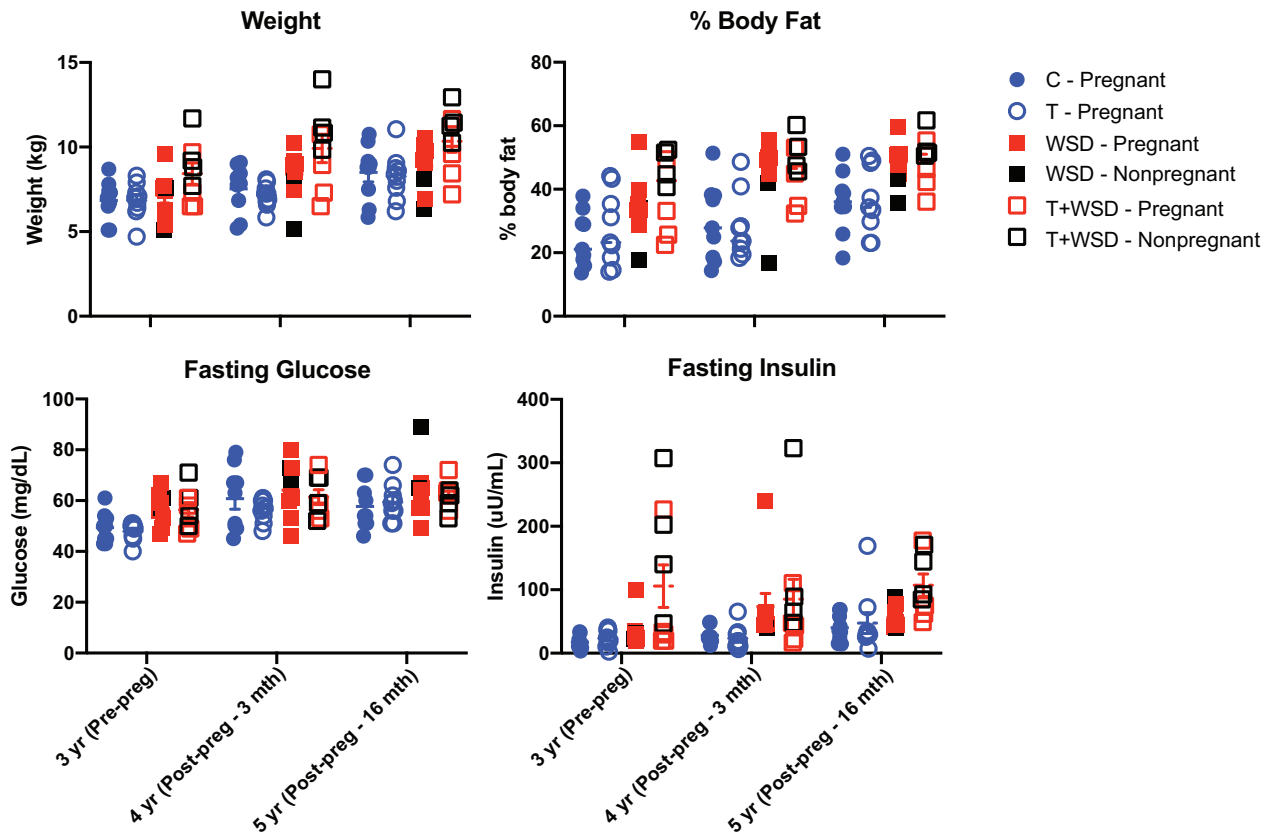

**Supplementary Figure S2. Metabolic parameters between Years 3 and 5 of treatment for pregnant and nonpregnant animals.** Body weight, % body fat, fasting glucose and insulin are presented from all animals regardless of parity. Pregnant animals are shown in colored symbols, while the nonpregnant WSD (n = 2) and T + WSD (n = 4) are shown in black symbols. Mean  $\pm$  SEM is displayed for all animals within the group. T, testosterone; WSD, Western-style diet.
