# Supplementary material
Source: PubMed Central journal article supplement (PMC7829549)
Supplement: deaa321_supplementary_figure3.pdf [file deaa321_supplementary_figure3.pdf]

A. Early Follicular Phase

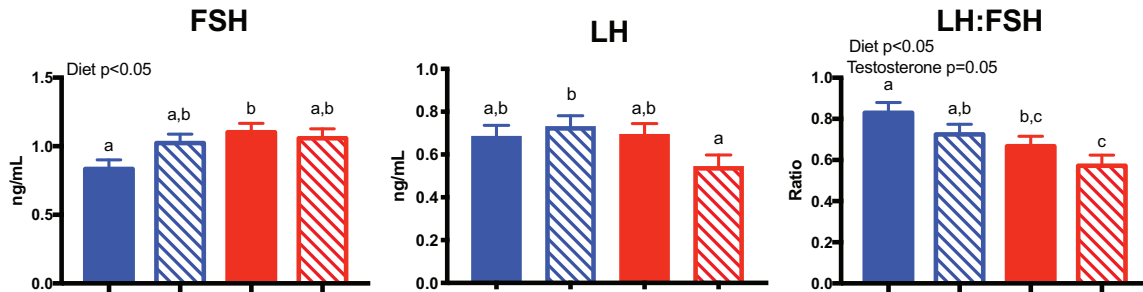

B. Late Luteal Phase

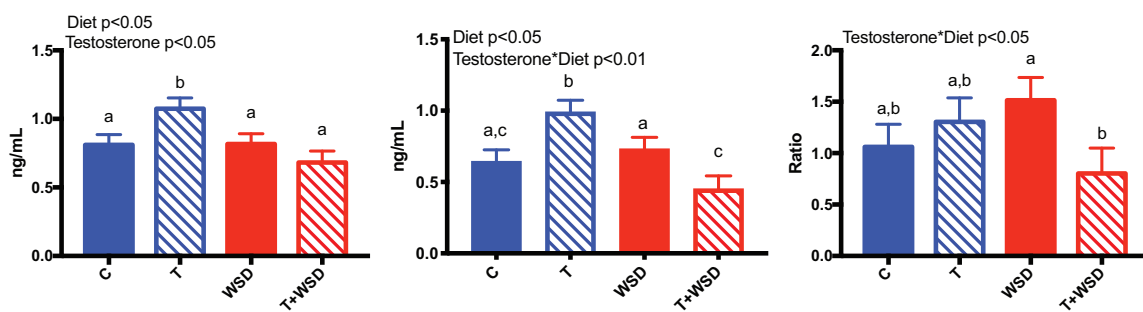

**Supplementary Figure S3.** Analyses of gonadotropins FSH, LH and LH:FSH ratio, data based on values averaged over 3 days of sampling in the (A) early follicular phase (Days 0–2 post-menses) and (B) late luteal phase (Days –2 to 0 from menses). Data are presented as means  $\pm$  SEM for each group. Significant effects of WSD and/or T or interactions between these treatments determined by linear models ANOVA are presented as text within the graphs. Different letters signify significant group differences as determined by Tukey–Kramer *post hoc* analysis. T, testosterone; WSD, Western-style diet.
